# Supplementary material for: A pilot study on record reviewing with a priori patient selection
Source: PubMed Central journal article supplement — BMJ Open. 2013 Jul 18;3(7):e003034. doi: 10.1136/bmjopen-2013-003034 (PMC3717450; doi:10.1136/bmjopen-2013-003034), 2013-07-18
Supplement: bmjopen-2013-003034.draft_revisions.pdf [file bmjopen-2013-003034.draft_revisions.pdf]

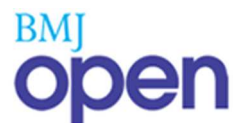

### Record reviewing with a priori patient selection:

|                                    |                                                                                                                                                                                                                                                                                                                                                                                                                                      |
|------------------------------------|--------------------------------------------------------------------------------------------------------------------------------------------------------------------------------------------------------------------------------------------------------------------------------------------------------------------------------------------------------------------------------------------------------------------------------------|
| Journal:                           | <i>BMJ Open</i>                                                                                                                                                                                                                                                                                                                                                                                                                      |
| Manuscript ID:                     | bmjopen-2013-003034                                                                                                                                                                                                                                                                                                                                                                                                                  |
| Article Type:                      | Research                                                                                                                                                                                                                                                                                                                                                                                                                             |
| Date Submitted by the Author:      | 06-May-2013                                                                                                                                                                                                                                                                                                                                                                                                                          |
| Complete List of Authors:          | Cihangir, Sezgin; Dutch Hospital Data, ;<br>Borghans, Ine; Dutch Healthcare Inspectorate (IGZ),<br>Hekkert, Karin; Dutch Hospital Data,<br>Muller, Hein; Tergooi Hospitals, Internal Medicine<br>Westert, Gert; Radboud University Nijmegen Medical Centre, Institute for<br>Quality of Healthcare (IQ Healthcare)<br>Kool, Tijn; Radboud University Nijmegen Medical Centre, Institute for<br>Quality of Healthcare (IQ Healthcare) |
| <b>Primary Subject<br>Heading</b>: | Public health                                                                                                                                                                                                                                                                                                                                                                                                                        |
| Secondary Subject Heading:         | Oncology                                                                                                                                                                                                                                                                                                                                                                                                                             |
| Keywords:                          | PUBLIC HEALTH, Length of Stay, Colorectal cancer, Record reviewing,<br>Adverse events < THERAPEUTICS, trigger tool                                                                                                                                                                                                                                                                                                                   |
|                                    |                                                                                                                                                                                                                                                                                                                                                                                                                                      |

SCHOLARONE™  
Manuscripts

For peer review only

## Record reviewing with a priori patient selection

Authors:

[Cihangir, Sezgin](#) (contact)<sup>1 6</sup>; Borghans, Ine<sup>2</sup>; Hekkert, Karin<sup>3</sup>; Muller, Hein<sup>4</sup>; Westert, Gert<sup>5</sup>; Kool, Tijn<sup>5</sup>

Affiliations:

1. Dutch Hospital Data  
Oudlaan 4 , Utrecht 3515GA Netherlands
2. Dutch Healthcare Inspectorate (IGZ)  
Utrecht Netherlands
3. Dutch Hospital Data  
Utrecht Netherlands
4. Tergooi Hospitals - Internal Medicine  
Hilversum Netherlands
5. Radboud University Nijmegen Medical Centre - Institute for Quality of Healthcare (IQ  
Healthcare) Nijmegen Netherlands
6. Govert Flinckstraat 186-c , Amsterdam 1073CB  
Netherlands

**Keywords:** PUBLIC HEALTH, Length of Stay ✦, Colorectal cancer ✦, Record reviewing ✦, Adverse events < THERAPEUTICS, trigger tool

## Article Summary

### Article focus

- Record reviewing in order to identify adverse events is time-consuming.
- A priori selection of patient records on the basis of Unexpectedly Long Length of Stay (UL-LOS) can be an efficient way to increase the chance of finding adverse events.

### Key message

- Selection of patient records with the UL-LOS and use of the Global Trigger tool appear to be a powerful way of finding a majority of adverse events while limiting the number of patient records to be reviewed and thereby saving the reviewing physicians' valuable time.

### Strengths and limitations

- This is the first study to look at the effectiveness of UL-LOS
- A limitation of the study is that it was investigated in only one group of patients. Future research should investigate the effectiveness of UL-LOS in other diagnostic groups

**Author's statement:** The authors declare that there are no competing interests, the research did not receive any funding and there are no additional unpublished data from the study. The study did not involve human subjects and the design of the study does not require ethical approval.

## Abstract

**Objectives:** To investigate whether a priori selection of patient records using Unexpectedly Long Length of Stay (UL-LOS) leads to detection of more records with adverse events (AEs) compared to non-UL-LOS.

**Design:** To investigate the opportunities of the UL-LOS, we looked for AEs in all records of patients with colorectal cancer. Within this group, we compared the number of AEs found in records of patients with a UL-LOS with the number found in records of patients who did not have a UL-LOS.

**Setting:** Our study was done at a general hospital in the Netherlands. The hospital is medium sized with approximately 30,000 admissions on an annual basis. The hospital has two major locations in different cities where both primary and secondary care is provided.

**Participants:** The patient records of 191 patients with colorectal cancer were reviewed.

**Primary and secondary outcome measures:** Number of triggers and adverse events were the primary outcome measures.

**Results:** In the records of patients with colorectal cancer who had a UL-LOS, 51% of the records contained one or more AEs compared to 9% in the reference group of non-UL-LOS patients. By reviewing only the UL-LOS group with at least one trigger, we found in 84% (43 out of 51) of these records at least one adverse event.

**Conclusions:** A priori selection of patient records using the UL-LOS indicator appears to be a powerful selection method which could be an effective way for healthcare professionals to identify opportunities to improve patient safety in their day-to-day work.

Word count abstract: 248

For peer review only

1  
2  
3  
4  
5  
6  
7  
8  
9  
10  
11  
12  
13  
14  
15  
16  
17  
18  
19  
20  
21  
22  
23  
24  
25  
26  
27  
28  
29  
30  
31  
32  
33  
34  
35  
36  
37  
38  
39  
40  
41  
42  
43  
44  
45  
46  
47  
48  
49  
50  
51  
52  
53  
54  
55  
56  
57  
58  
59  
60

## Introduction

Diminishing the number of patient-related adverse events is one of the top priorities for hospitals. A common way to achieve this is to learn from incidents and take action to prevent recurrence. To identify the adverse events, retrospective patient record review has become the 'gold standard' internationally(1-5). By retrospectively reviewing patient records, healthcare professionals are able to identify adverse events that occurred during the care process. Several studies on retrospective patient record review in different countries have shown a wide range of incidences of adverse events, varying from 2.9% to 16.6% with a median overall incidence of adverse events of 9.2%(6-8). This implies that, with random selection from all hospital records, a healthcare professional has to review 6 to 34 records to find one adverse event. These results show that although record reviewing has been proved very advantageous in finding adverse events, there is an important disadvantage: record reviewing is very time-consuming. Although most Dutch hospitals want to analyse their patient records for adverse events in order to identify patient safety opportunities, many hospitals are not able to mobilise enough physicians who can spend many hours reviewing patient records.

Looking for more efficient ways to organise patient record reviewing, we investigated how to increase the chance of finding adverse events. Previous research has shown strong relationships between adverse events and outcomes of quality indicators at patient and hospital level(9-11). For instance, one study identified a relationship between complications and increased mortality and length of stay (LOS)(12). A more recent study on the United States Veterans Health Administration data replicated these relationships between adverse events and patient safety indicators of the Agency for Healthcare Research and Quality(14).

Several other studies have indicated that adverse events often lead to prolonged LOS, and prolonged LOS could signal safety issues(15-24). Silber et al for instance showed that LOS can be used to reflect how well hospitals and providers deal with complications and adverse events(25).

1  
2  
3 The above mentioned studies suggest that negative results on quality indicators could be  
4 attributed to adverse events. In the current study, we hypothesize that records of patients with an  
5 Unexpectedly Long Length of Stay (UL-LOS) will show more adverse events. This patient safety  
6 indicator is already three years in use by Dutch hospitals and derived from administrative medical  
7 data. If so, the indicator could be used for selecting patient records in order to find more adverse  
8 events and save the valuable time of those reviewing patient records.  
9  
10  
11  
12  
13

14  
15  
16 To test the hypothesis that looking for adverse events can be done efficiently by selecting patient  
17 records using UL-LOS, we conducted a pilot study with a retrospective review of patient records  
18 in Tergooiziekenhuizen, a general hospital in the Netherlands. This article describes the pilot  
19 study. The results of this study might help hospitals organise their record-reviewing process in the  
20 most efficient way possible by using the quality indicator that already is available to them through  
21 existing registries.  
22  
23  
24  
25  
26  
27  
28  
29

## 30 **Methods**

### 31 **The quality indicator UL-LOS**

32 In our study, we used the quality indicator UL-LOS 2009 to make the a priori selection. The UL-  
33 LOS is based on the data from the National Medical Registration (LMR). The LMR contains  
34 demographical patient information, admission related hospital data such as diagnosis, and  
35 surgical procedures (26). UL-LOS is generated by indirect standardisation on three patient  
36 characteristics: age, primary diagnosis, and the main procedure that the patient underwent. Age  
37 of the patient is divided into 5 classes of 0, 1-14, 15-44, 45-64, and 65 and older. For the primary  
38 diagnoses we used the diagnosis that led to the admission which includes approximately 1,000  
39 diagnoses classified by the ICD9 in three digits. Finally, the main procedure is determined by the  
40 Dutch Classification System of Procedures and is considered to depend on the diagnosis of the  
41 patient. On average it includes five main procedural groups. Together, these three parameters  
42 resulted in  $5 \times 5 \times 1,000 = 25,000$  cells. For each cell the mean length of stay has been taken as  
43 the expected length of stay. Then the ratio between the actual length of stay and the expected  
44 length of stay is taken to calculate the UL-LOS. We define the UL-LOS as a LOS that is more  
45  
46  
47  
48  
49  
50  
51  
52  
53  
54  
55  
56  
57  
58  
59  
60

1  
2  
3 than 50% longer than expected. Patients who died in the hospital are excluded. In addition, UL-  
4  
5 LOS is a quality indicator Dutch hospitals use for their quality-improvement programmes and the  
6  
7 Dutch Health Care Inspectorate uses UL-LOS in its supervision of hospital care.  
8  
9

### 10 **Setting**

11  
12 The study was done in 2010 and 2011 at Tergooiziekenhuizen, a general hospital with nearly  
13  
14 30,000 clinical admissions a year. We used data and patient records from 2009. The hospital  
15  
16 board gave us permission to use the data.  
17  
18  
19

### 20 **Reference groups**

21  
22 To assess the impact of the indicator UL-LOS, we selected records with the UL-LOS and  
23  
24 compared these records with the reference group consisted of comparable patients who were  
25  
26 treated at Tergooiziekenhuizen without a UL-LOS.  
27  
28  
29

### 30 **Analysis with the IHI Global Trigger Tool**

31  
32 A nurse used the IHI (Institute for Healthcare Improvement) Global Trigger Tool to search all  
33  
34 selected patient records for triggers(27). Triggers may contain clues for identifying possible  
35  
36 adverse events. This instrument adapts the classification from the National Coordinating Council  
37  
38 for Medication Error Reporting and Prevention (NCC MERP) Index for Categorizing Errors.  
39  
40 Although originally developed for categorising medication errors, these definitions can be easily  
41  
42 applied to any type of adverse event. The IHI Global Trigger Tool was developed to count  
43  
44 adverse events, determine the harm to the patient, and whether the adverse event was the result  
45  
46 of a commission. According to the IHI, only cases of commission should be counted. However we  
47  
48 also counted cases of omission, as these are also a valuable source of possible quality  
49  
50 improvement(5, 28).  
51  
52

53  
54 Accordingly, the tool excludes the categories A to D from the NCC MERP Index, because these  
55  
56 categories describe incidents that do not cause harm. We used the categories E to I, which do  
57  
58 describe harm that may have contributed to or resulted in:  
59  
60



- 1
- 2
- 3 • temporary harm to the patient and required intervention (Category E);
- 4
- 5 • temporary harm to the patient and required initial or prolonged hospitalisation (Category
- 6 F);
- 7
- 8 • permanent patient harm (Category G);
- 9
- 10 • intervention required to sustain life (Category H); and
- 11
- 12 • contributed to patient death (Category I).
- 13
- 14
- 15
- 16
- 17
- 18
- 19
- 20
- 21
- 22
- 23
- 24
- 25
- 26
- 27
- 28
- 29
- 30
- 31
- 32
- 33
- 34
- 35
- 36
- 37
- 38
- 39
- 40
- 41
- 42
- 43
- 44
- 45
- 46
- 47
- 48
- 49
- 50
- 51
- 52
- 53
- 54
- 55
- 56
- 57
- 58
- 59
- 60

A surgeon and an internist-nephrologist investigated and looked for adverse events in the patient records in which the nurse had found triggers. The physicians and nurses were trained according to the IHI Trigger Tool implementation programme. The patient records were randomly divided between the physicians. They analysed these records in the same room in order to discuss difficult cases and make use of each other's expertise. If necessary, they consulted other physicians in the hospital to make their judgments as accurate as possible. The harm caused by an adverse event was categorised according to the NCC MERP Index as indicated above. They also classified the adverse events into five categories: care, operation, medication, intensive care (IC), and other.

#### **A priori record selection with UL-LOS**

We selected all records of patients with an admission for colorectal cancer in 2009. Patients with colorectal cancer are generally considered to be a homogenous population in terms of LOS, and are relatively vulnerable to adverse events(29). We excluded duplicated records, records of palliative patients, and patients who died in the hospital. Then we selected patient records with a UL-LOS. A nurse screened all these selected records for the presence of triggers with the Trigger tool. Patient records with triggers were forwarded to the physicians to be investigated for adverse events and the possible harm to patients. We categorised all records on the basis of the ratio between actual and expected LOS, into four groups:

- 1) actual LOS equal or less than 50% longer than expected;
- 2) actual LOS 50% - 99% longer than expected;
- 3) actual LOS 100% - 199% longer than expected;

1  
2  
3 4) actual LOS 200% or more above the expected LOS.

4  
5 The last three categories together form the patient group with a UL-LOS. The first category is  
6  
7 the patient group we call non-UL-LOS which is at the same time the reference group.  
8  
9

## 10 **Results**

### 11 **UL-LOS-based record selection**

12  
13  
14 In 2009, the hospital in our study admitted, treated, and discharged 191 patients with colorectal  
15  
16 cancer. From this group, we excluded the duplicated patient records and patients who were  
17  
18 admitted for palliative care which resulted in 129 unique patient records. From this group, we  
19  
20 selected 85 patients with a UL-LOS (66%). Screening by our nurse with the trigger tool revealed  
21  
22 that 51 of these UL-LOS records contained one or more triggers. Thus, 27% of 191 records  
23  
24 remained to be reviewed by our physicians. Of these records, 43 patient records included one or  
25  
26 more adverse events: 27 records contained one adverse event; 10 records contained two  
27  
28 adverse events; 4 records contained three adverse events; and 2 records contained four adverse  
29  
30 events (see Figure 1).  
31  
32

33  
34 <<Figure 1>>  
35  
36

37  
38 In Table 1, we present the physicians' classification. The adverse events were classified mainly  
39  
40 as operation-related (45%); 60% of the adverse events were considered to have resulted in  
41  
42 temporary harm to the patient, and required initial or prolonged hospitalisation (category F).  
43  
44  
45  
46  
47  
48  
49  
50  
51  
52  
53  
54  
55  
56  
57  
58  
59  
60

Table 1. Number, type, and severity ratings of adverse events found in records of patients admitted with colorectal cancer and a UL-LOS

|                                  |                                                                                    | Type of adverse event |           |            |           |            | Total |             |
|----------------------------------|------------------------------------------------------------------------------------|-----------------------|-----------|------------|-----------|------------|-------|-------------|
|                                  |                                                                                    | Care                  | Medical   | Operation  | IC        | Other      |       |             |
| Severity rating of adverse event | E: temporary harm to the patient and required intervention                         | 7                     | 2         | 3          | 1         | 4          | 17    | <b>25%</b>  |
|                                  | F: temporary harm to the patient and required initial or prolonged hospitalisation | 9                     | 4         | 21         | 2         | 4          | 40    | <b>60%</b>  |
|                                  | G: permanent patient harm                                                          | 0                     | 0         | 4          | 0         | 1          | 5     | <b>7%</b>   |
|                                  | H: intervention required to sustain life                                           | 1                     | 0         | 1          | 0         | 0          | 2     | <b>3%</b>   |
|                                  | I: contributed to patient death                                                    | 1                     | 0         | 1          | 0         | 1          | 3     | <b>4%</b>   |
|                                  | Total                                                                              | 18                    | 6         | 30         | 3         | 10         | 67    |             |
|                                  |                                                                                    | <b>27%</b>            | <b>9%</b> | <b>45%</b> | <b>4%</b> | <b>15%</b> |       | <b>100%</b> |

### The reference group: non-UL-LOS patients

Table 2 shows the number of adverse events compared between UL-LOS and non-UL-LOS patients. In the non-UL-LOS group, in 9% (4 out of 44) of the reviewed records, at least one adverse event was found, compared to 51% (43 out of 85) in the UL-LOS group. We also compared three categories within the UL-LOS (table 2).

Table 2 Number of adverse events compared between UL-LOS and non-UL-LOS patients and within the UL-LOS categories

|                                                                  | N records | N records containing at least 1 trigger | N (and % of) records containing at least 1 adverse event |
|------------------------------------------------------------------|-----------|-----------------------------------------|----------------------------------------------------------|
| Non-UL-LOS patients                                              | 44        | 6                                       | 4 (9%)                                                   |
| All patients with a UL-LOS                                       | 85        | 51                                      | 43 (51%)                                                 |
| - Of which patients with 50%-99% longer-than-expected LOS        | 33        | 14                                      | 9 (27%)                                                  |
| - Of which patients with 100%-199% longer-than-expected LOS      | 32        | 22                                      | 20 (63%)                                                 |
| - Of which patients with 200% and above longer-than-expected LOS | 20        | 15                                      | 14 (70%)                                                 |

## Discussion

With a priori selection using the UL-LOS indicator, we found adverse events in 51% of the records, compared to 9% in the non-UL-LOS group. By reviewing only the UL-LOS group with at least one trigger, we found in 84% (43 out of 51) of these records at least one adverse event. The fact that almost all records including one or more adverse events can be found by concentrating on records of patients with a UL-LOS and triggers is encouraging for hospitals struggling with a sparse capacity of reviewing physicians.

The percentages of records in which adverse events were identified in the different categories of UL-LOS show that the present formal quality indicator used by the Dutch Health Care Inspectorate identifies most adverse events. Our results show a rise in the percentage in which at least one adverse event was found from 50% longer LOS onwards. However, it also rises from 100% onwards. A more detailed study is needed to determine the appropriateness of the 50% threshold. These results apply to colorectal cancer. Future research could also investigate

1  
2  
3 whether this threshold is appropriate for all diagnostic groups or whether we need varying  
4  
5 percentages.  
6  
7

8  
9 An interesting finding is that only 45% of the adverse events in a group of surgical patients such  
10  
11 as those with colorectal cancer is related to the classification 'operation'. It seems that quality of  
12  
13 care is determined by the whole chain of care, not only by the quality of the organisation in the  
14  
15 operating room or the professionals performing the operation.  
16

### 17 18 Limitations

19  
20 An important limitation of this study is that we identified the number of adverse events in only one  
21  
22 group of patients and in only one hospital. Future research should show whether identifying  
23  
24 adverse events in more patient records, also from other patient groups in more hospitals, gives  
25  
26 comparable results.  
27

28  
29  
30 Another limitation is the fact that, although we chose to have two physicians analyse the patient  
31  
32 records together, both of them reviewed different records with consulting each other intensively.  
33  
34 Therefore we could not measure the interrater reliability. Our main concern was to organise the  
35  
36 review process as efficiently as possible. Therefore, we chose parallel record reviewing.  
37  
38 However, further research should show whether parallel analysis is reliable enough compared  
39  
40 with consecutive analysis, which still contends with poor reliability (27, 28).  
41

42  
43  
44 The results of this study are encouraging in showing that hospitals can and will use quality  
45  
46 indicators based on administrative data for patient safety policy. This type of hospital data is  
47  
48 usually easily available without an extra administrative burden for hospitals. Earlier research has  
49  
50 shown the reliability of using administrative data in relation to clinical data(30). However, the  
51  
52 reliability of indicators such as UL-LOS depends on the quality of coding in hospitals(31). Also in  
53  
54 the Netherlands, the quality of administrative hospital data is subject to debate. If the quality of  
55  
56 data coding in hospitals were to improve, the selection efficiency of quality indicators such as UL-  
57  
58 LOS would probably be more accurate.  
59  
60

**Conclusion**

Easily available selection methods such as UL-LOS and the Global Trigger tool may be a powerful way of finding a majority of adverse events while limiting the number of patient records to be reviewed and thereby saving the reviewing physicians' valuable time. This could help hospitals to organise their patient safety policy as efficiently as possible.

**Acknowledgment** We would like to thank A Jonkheim, who screened all of the patient files, and the physicians FC Henny and JW Juttman of Tergooiziekenhuizen, who went through all of the selected patient files.

**Funding:** None

**Contributorship:** All the authors listed in the article delivered substantial contributions to conception and design, acquisition of data, analysis and interpretation of data; helped drafting the article and revising it critically for important intellectual content; and gave the final approval of the version to be published.

**Data sharing:** There are no additional unpublished data from the study

**Competing Interests:** None

## References

## References

1. Baker GR, Norton PG, Flintoft V, Blais R, Brown A, Cox J, et al. The canadian adverse events study: The incidence of adverse events among hospital patients in canada. *CMAJ*. 2004 May 25;170(11):1678-86.
2. Davis P, Lay-Yee R, Briant R, Ali W, Scott A, Schug S. Adverse events in new zealand public hospitals I: Occurrence and impact. *N Z Med J*. 2002 Dec 13;115(1167):U271.
3. Michel P, Quenon JL, de Sarasqueta AM, Scemama O. Comparison of three methods for estimating rates of adverse events and rates of preventable adverse events in acute care hospitals. *BMJ*. 2004 Jan 24;328(7433):199.
4. Wilson RM, Runciman WB, Gibberd RW, Harrison BT, Newby L, Hamilton JD. The quality in australian health care study. *Med J Aust*. 1995 Nov 6;163(9):458-71.
5. Zegers M, de Bruijne MC, Wagner C, Hoonhout LH, Waaijman R, Smits M, et al. Adverse events and potentially preventable deaths in dutch hospitals: Results of a retrospective patient record review study. *Qual Saf Health Care*. 2009 08;18(4):297-302.
6. Thomas EJ, Studdert DM, Runciman WB, Webb RK, Sexton EJ, Wilson RM, et al. A comparison of iatrogenic injury studies in australia and the USA. I: Context, methods, casemix, population, patient and hospital characteristics. *Int J Qual Health Care*. 2000 Oct;12(5):371-8.
7. Runciman WB, Webb RK, Helps SC, Thomas EJ, Sexton EJ, Studdert DM, et al. A comparison of iatrogenic injury studies in australia and the USA. II: Reviewer behaviour and quality of care. *Int J Qual Health Care*. 2000 Oct;12(5):379-88.
8. de Vries EN, Ramrattan MA, Smorenburg SM, Gouma DJ, Boermeester MA. The incidence and nature of in-hospital adverse events: A systematic review. *Qual Saf Health Care*. 2008 Jun;17(3):216-23.
9. Zhan C, Kelley E, Yang HP, Keyes M, Battles J, Borotkanics RJ, et al. Assessing patient safety in the united states: Challenges and opportunities. *Med Care*. 2005 Mar;43(3 Suppl):I42-7.
10. Zhan C, Miller MR. Administrative data based patient safety research: A critical review. *Qual Saf Health Care*. 2003 Dec;12 Suppl 2:ii58-63.
11. Iezzoni LI, Daley J, Heeren T, Foley SM, Fisher ES, Duncan C, et al. Identifying complications of care using administrative data. *Med Care*. 1994 Jul;32(7):700-15.
12. Iezzoni LI. Risk adjustment for measuring health care outcomes. 3rd ed. Chicago: Health Administration Press; 2003.
13. Zhan C, Miller MR. Excess length of stay, charges, and mortality attributable to medical injuries during hospitalization. *JAMA*. 2003 Oct 8;290(14):1868-74.
14. Rivard PE, Luther SL, Christiansen CL, Shibe Z, Loveland S, Elixhauser A, et al. Using patient safety indicators to estimate the impact of potential adverse events on outcomes. *Med Care Res Rev*. 2008 Feb;65(1):67-87.

15. Hoonhout LH, de Bruijne MC, Wagner C, Asscheman H, van der Wal G, van Tulder MW. Nature, occurrence and consequences of medication-related adverse events during hospitalization: A retrospective chart review in the netherlands. *Drug Saf.* 2010 10/01;33(10):853-64.
16. Hoonhout LH, de Bruijne MC, Wagner C, Zegers M, Waaijman R, Spreeuwenberg P, et al. Direct medical costs of adverse events in dutch hospitals. *BMC Health Serv Res.* 2009;9:27.
17. Sari AB, Sheldon TA, Cracknell A, Turnbull A, Dobson Y, Grant C, et al. Extent, nature and consequences of adverse events: Results of a retrospective casenote review in a large NHS hospital. *Qual Saf Health Care.* 2007 12;16(6):434-9.
18. Ehsani JP, Jackson T, Duckett SJ. The incidence and cost of adverse events in victorian hospitals 2003-04. *Med J Aust.* 2006 06/05;184(11):551-5.
19. Cho SH, Ketefian S, Barkauskas VH, Smith DG. The effects of nurse staffing on adverse events, morbidity, mortality, and medical costs. *Nurs Res.* 2003 03;52(2):71-9.
20. Camp M, Chang DC, Zhang Y, Chrouser K, Colombani PM, Abdullah F. Risk factors and outcomes for foreign body left during a procedure: Analysis of 413 incidents after 1 946 831 operations in children. *Arch Surg.* 2010 11;145(11):1085-90.
21. Lotfipour S, Kaku SK, Vaca FE, Patel C, Anderson CL, Ahmed SS, et al. Factors associated with complications in older adults with isolated blunt chest trauma. *West J Emerg Med.* 2009 05;10(2):79-84.
22. Williams DJ, Olsen S, Crichton W, Witte K, Flin R, Ingram J, et al. Detection of adverse events in a scottish hospital using a consensus-based methodology. *Scott Med J.* 2008 11;53(4):26-30.
23. Kaushal R, Bates DW, Franz C, Soukup JR, Rothschild JM. Costs of adverse events in intensive care units. *Crit Care Med.* 2007 11;35(11):2479-83.
24. Rice-Townsend S, Hall M, Jenkins KJ, Roberson DW, Rangel SJ. Analysis of adverse events in pediatric surgery using criteria validated from the adult population: Justifying the need for pediatric-focused outcome measures. *J Pediatr Surg.* 2010 06;45(6):1126-36.
25. Silber JH, Rosenbaum PR, Koziol LF, Sutaria N, Marsh RR, Even-Shoshan O. Conditional length of stay. *Health Serv Res.* 1999 Apr;34(1 Pt 2):349-63.
26. Landelijke medische registratie (LMR) [Internet].: Dutch Hospital Data. Available from: <http://www.dutchhospitaldata.nl/Registraties/LMR.php>.
27. Griffin F, Resar R. IHI global trigger tool for measuring adverse events. Second Edition ed. Massachusetts: Institute for Healthcare Improvement; 2009.
28. Langelaan M, Baines RJ, Broekens MA, Siemerink KM, van de Steeg L, Asscheman H, et al. Monitor zorggerelateerde schade 2008, dossieronderzoek in nederlandse ziekenhuizen. NIVEL; 2010.
29. Sjo OH, Larsen S, Lunde OC, Nesbakken A. Short term outcome after emergency and elective surgery for colon cancer. *Colorectal Dis.* 2009 Sep;11(7):733-9.
30. Aylin P, Bottle A, Majeed A. Use of administrative data or clinical databases as predictors of risk of death in hospital: Comparison of models. *BMJ.* 2007 May 19;334(7602):1044.



1  
2  
3 31. van den Bosch WF, Kelder JC, Wagner C. Predicting hospital mortality among frequently  
4 readmitted patients: HSMR biased by readmission. BMC Health Serv Res. 2011;11:57.  
5  
6  
7  
8  
9  
10  
11  
12  
13  
14  
15  
16  
17  
18  
19  
20  
21  
22  
23  
24  
25  
26  
27  
28  
29  
30  
31  
32  
33  
34  
35  
36  
37  
38  
39  
40  
41  
42  
43  
44  
45  
46  
47  
48  
49  
50  
51  
52  
53  
54  
55  
56  
57  
58  
59  
60

1  
2  
3  
4  
5  
6  
7  
8  
9  
10  
11  
12  
13  
14  
15  
16  
17  
18  
19  
20  
21  
22  
23  
24  
25  
26  
27  
28  
29  
30  
31  
32  
33  
34  
35  
36  
37  
38  
39  
40  
41  
42  
43

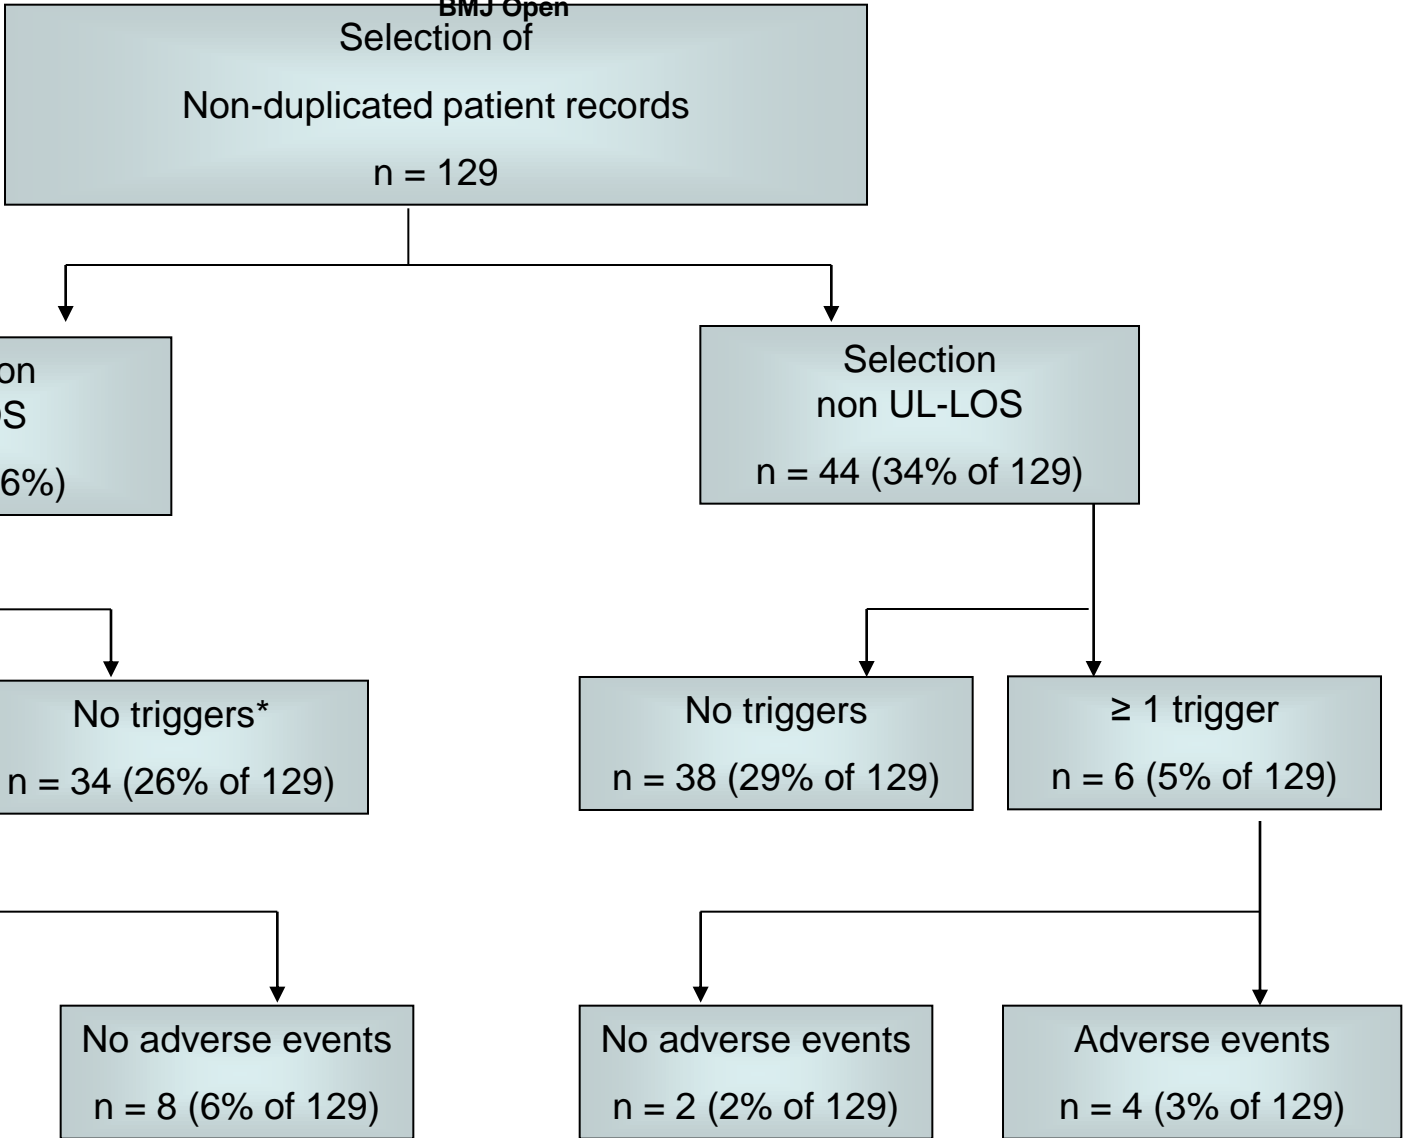

\*Only trigger: increased length of stay

n=number of patient records For peer review only - <http://bmjopen.bmj.com/site/about/guidelines.xhtml>

% is of total selection of patient records

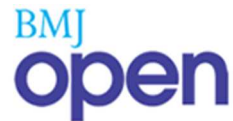

**A Pilot Study on record reviewing with a priori patient selection:**

|                                 |                                                                                                                                                                                                                                                                                                                                                                                                                |
|---------------------------------|----------------------------------------------------------------------------------------------------------------------------------------------------------------------------------------------------------------------------------------------------------------------------------------------------------------------------------------------------------------------------------------------------------------|
| Journal:                        | <i>BMJ Open</i>                                                                                                                                                                                                                                                                                                                                                                                                |
| Manuscript ID:                  | bmjopen-2013-003034.R1                                                                                                                                                                                                                                                                                                                                                                                         |
| Article Type:                   | Research                                                                                                                                                                                                                                                                                                                                                                                                       |
| Date Submitted by the Author:   | 17-Jun-2013                                                                                                                                                                                                                                                                                                                                                                                                    |
| Complete List of Authors:       | Cihangir, Sezgin; Dutch Hospital Data, ; Borghans, Ine; Dutch Healthcare Inspectorate (IGZ), Hekker, Karin; Dutch Hospital Data, Muller, Hein; Tergooi Hospitals, Internal Medicine Westert, Gert; Radboud University Nijmegen Medical Centre, Institute for Quality of Healthcare (IQ Healthcare) Kool, Tijn; Radboud University Nijmegen Medical Centre, Institute for Quality of Healthcare (IQ Healthcare) |
| <b>Primary Subject Heading</b>: | Public health                                                                                                                                                                                                                                                                                                                                                                                                  |
| Secondary Subject Heading:      | Oncology                                                                                                                                                                                                                                                                                                                                                                                                       |
| Keywords:                       | PUBLIC HEALTH, Length of Stay, Colorectal cancer, Record reviewing, Adverse events < THERAPEUTICS, trigger tool                                                                                                                                                                                                                                                                                                |
|                                 |                                                                                                                                                                                                                                                                                                                                                                                                                |

SCHOLARONE™  
Manuscripts

## Article Summary

### Article focus

- Record reviewing in order to identify adverse events is time-consuming.
- A priori selection of patient records on the basis of Unexpectedly Long Length of Stay (UL-LOS) can be an efficient way to increase the chance of finding adverse events.

### Key message

- Selection of patient records with the UL-LOS and use of the Global Trigger Tool appear to be a powerful way of finding a majority of adverse events while limiting the number of patient records to be reviewed and thereby saving the reviewing physicians' valuable time.

### Strengths and limitations

- This is the first study to look at the effectiveness of UL-LOS.
- A limitation of the study is that it was investigated in only one group of patients. Future research should investigate the effectiveness of UL-LOS in other diagnostic groups.

**Author's statement:** The authors declare that there are no competing interests, the research did not receive any funding and there are no additional unpublished data from the study. The study did not involve human subjects and the design of the study does not require ethical approval.

1  
2  
3 **Objectives:** To investigate whether a priori selection of patient records using Unexpectedly Long  
4 Length of Stay (UL-LOS) leads to detection of more records with adverse events (AEs) compared  
5 to non-UL-LOS.  
6  
7

8  
9  
10 **Design:** To investigate the opportunities of the UL-LOS, we looked for AEs in all records of  
11 patients with colorectal cancer. Within this group, we compared the number of AEs found in  
12 records of patients with a UL-LOS with the number found in records of patients who did not have  
13 a UL-LOS.  
14  
15  
16  
17

18  
19  
20 **Setting:** Our study was done at a general hospital in the Netherlands. The hospital is medium  
21 sized with approximately 30,000 admissions on an annual basis. The hospital has two major  
22 locations in different cities where both primary and secondary care is provided.  
23  
24  
25  
26

27  
28 **Participants:** The patient records of 191 patients with colorectal cancer were reviewed.  
29  
30

31  
32 **Primary and secondary outcome measures:** Number of triggers and adverse events were the  
33 primary outcome measures.  
34  
35  
36

37  
38 **Results:** In the records of patients with colorectal cancer who had a UL-LOS, 51% of the records  
39 contained one or more AEs compared to 9% in the reference group of non-UL-LOS patients. By  
40 reviewing only the UL-LOS group with at least one trigger, we found in 84% (43 out of 51) of  
41 these records at least one adverse event.  
42  
43  
44  
45

46  
47 **Conclusions:** A priori selection of patient records using the UL-LOS indicator appears to be a  
48 powerful selection method which could be an effective way for healthcare professionals to identify  
49 opportunities to improve patient safety in their day-to-day work.  
50  
51  
52

53  
54  
55 **Word count abstract:** 248  
56  
57  
58  
59  
60

## Introduction

Within health services research, increased attention is focusing on patient outcomes. This results from the need to improve care and the need to reduce costs. As studies increasingly evaluate patient care, the need exists to identify adverse outcomes within patient medical records. This is a major challenge because medical records are usually extensive and sometimes difficult to evaluate. In the United States, this subject is being addressed by computer algorithms such as the Potentially Preventable Complications and the Potentially Preventable Readmissions software. These algorithms use hospital discharge abstract data to identify adverse outcomes in large populations. The development of these algorithms has been a long and resource intensive process[1]. The current research addresses this important subject by developing a tool for identifying adverse outcomes in the Netherlands. The research involved patients at a medium sized hospital where the volume of inpatients makes the identification of specific patients with adverse outcomes a challenging undertaking.

Furthermore, diminishing the number of patient-related adverse events became one of the top priorities for Dutch hospitals. A common way to achieve this is to learn from incidents and take action to prevent recurrence. To identify the adverse events, retrospective patient record review has become the 'gold standard' (inter)nationally[2-6]. By retrospectively reviewing patient records, healthcare professionals are able to identify adverse events that occurred during the care process. Several studies on retrospective patient record review in different countries have shown a wide range of incidences of adverse events, varying from 2.9% to 16.6% with a median overall incidence of adverse events of 9.2%[7-9]. This implies that, with random selection from all hospital records, a healthcare professional has to review 6 to 34 records to find one adverse event. These results show that although record reviewing has been proved very advantageous in finding adverse events, there is an important disadvantage: record reviewing is very time-consuming. Although most Dutch hospitals want to analyse their patient records for adverse events in order to identify patient safety opportunities, many hospitals are not able to mobilise enough physicians who can spend many hours reviewing patient records.

1  
2  
3 Looking for more efficient ways to organise patient record reviewing, we investigated how to  
4 increase the chance of finding adverse events. Previous research has shown strong relationships  
5 between adverse events and outcomes of quality indicators at patient and hospital level[10-12].  
6  
7 For instance, one study identified a relationship between complications and increased mortality  
8 and length of stay (LOS)[13]. A more recent study on the United States Veterans Health  
9 Administration data replicated these relationships between adverse events and patient safety  
10 indicators of the Agency for Healthcare Research and Quality[14]. Several other studies have  
11 indicated that adverse events often lead to prolonged LOS, and prolonged LOS could signal  
12 safety issues[15-24]. Silber et al for instance showed that LOS can be used to reflect how well  
13 hospitals and providers deal with complications and adverse events[25].  
14  
15  
16  
17  
18  
19  
20  
21  
22  
23

24 The above mentioned studies suggest that negative results on quality indicators could be  
25 attributed to adverse events. In the current study, we hypothesize that records of patients with an  
26 Unexpectedly Long Length of Stay (UL-LOS) will show more adverse events. This patient safety  
27 indicator is already three years in use by Dutch hospitals and derived from administrative medical  
28 data. If so, the indicator could be used for selecting patient records in order to find more adverse  
29 events and save the valuable time of those reviewing patient records.  
30  
31  
32  
33  
34  
35  
36  
37

38 To test the hypothesis that looking for adverse events can be done efficiently by selecting patient  
39 records using UL-LOS, we conducted a pilot study with a retrospective review of patient records  
40 in Tergooiziekenhuizen, a general hospital in the Netherlands. This article describes the pilot  
41 study. The results of this study might help hospitals organise their record-reviewing process in the  
42 most efficient way possible by using the quality indicator that already is available to them through  
43 existing registries.  
44  
45  
46  
47  
48  
49  
50

## 51 **Methods**

### 52 **The quality indicator UL-LOS**

53  
54  
55 In our study, we used the quality indicator UL-LOS 2009 to make the a priori selection. The UL-  
56 LOS is based on the data from the National Medical Registration (LMR). The LMR contains  
57  
58  
59  
60

1  
2  
3 demographical patient information, admission related hospital data such as diagnosis, and  
4 surgical procedures[26]. UL-LOS is generated by indirect standardisation on three patient  
5 characteristics: age, primary diagnosis, and the main procedure that the patient underwent. Age  
6 of the patient is divided into 5 classes of 0, 1-14, 15-44, 45-64, and 65 and older. For the primary  
7 diagnoses we used the diagnosis that led to the admission which includes approximately 1,000  
8 diagnoses classified by the ICD9 in three digits. Finally, the main procedure is determined by the  
9 Dutch Classification System of Procedures and is considered to depend on the diagnosis of the  
10 patient. On average it includes five main procedural groups. Together, these three parameters  
11 resulted in  $5 \times 5 \times 1,000 = 25,000$  cells. For each cell the mean length of stay has been taken as  
12 the expected length of stay. Then the ratio between the actual length of stay and the expected  
13 length of stay is taken to calculate the UL-LOS. We define the UL-LOS as a LOS that is more  
14 than 50% longer than expected. Patients who died in the hospital are excluded. In addition, UL-  
15 LOS is a quality indicator Dutch hospitals use for their quality-improvement programmes and the  
16 Dutch Health Care Inspectorate uses UL-LOS in its supervision of hospital care.

### 32 **Setting**

33  
34 The study was done in 2010 and 2011 at Tergooiziekenhuizen, a general hospital with nearly  
35 30,000 clinical admissions a year. We used data and patient records from 2009. The hospital  
36 board gave us permission to use the data.

### 42 **Reference groups**

43  
44 To assess the impact of the indicator UL-LOS, we selected from 191 colorectal admissions,  
45 records with the UL-LOS and compared these records with the reference group consisting of  
46 comparable patients from the same specialty population, who were treated at  
47 Tergooiziekenhuizen without a UL-LOS.

### 54 **Analysis with the IHI Global Trigger Tool**

55  
56 A nurse used the IHI (Institute for Healthcare Improvement) Global Trigger Tool to search all  
57 selected patient records for triggers[27]. The nurse that did the screening of triggers for this study  
58  
59  
60



1  
2  
3 was experienced with the use of the Global Trigger Tool. Triggers may contain clues for  
4  
5 identifying possible adverse events. This instrument adapts the classification from the National  
6  
7 Coordinating Council for Medication Error Reporting and Prevention (NCC MERP[28]) Index for  
8  
9 Categorizing Errors. Although originally developed for categorising medication errors, these  
10  
11 definitions can be easily applied to any type of adverse event. The IHI Global Trigger Tool was  
12  
13 developed to count adverse events, determine the harm to the patient, and whether the adverse  
14  
15 event was the result of a commission. According to the IHI, only cases of commission should be  
16  
17 counted. However we also counted cases of omission, as these are also a valuable source of  
18  
19 possible quality improvement[6, 29].  
20

21  
22 Accordingly, the tool excludes the categories A to D from the NCC MERP Index, because these  
23  
24 categories describe incidents that do not cause harm. We used the categories E to I, which do  
25  
26 describe harm that may have contributed to or resulted in:  
27

- 28 • temporary harm to the patient and required intervention (Category E);
- 29 • temporary harm to the patient and required initial or prolonged hospitalisation (Category  
30  
31 F);
- 32 • permanent patient harm (Category G);
- 33 • intervention required to sustain life (Category H); and
- 34  
35 • contributed to or resulted in the patient's death (Category I).  
36  
37  
38  
39  
40  
41

42 A surgeon and an internist-nephrologist investigated and looked for adverse events in the patient  
43  
44 records in which the nurse had found triggers. The physicians and the nurse were trained  
45  
46 extensively according to the IHI Trigger Tool implementation programme to make sure that they  
47  
48 all worked according to the same IHI methodology. The patient records were randomly divided  
49  
50 between the physicians. They analysed these records in the same room in order to discuss  
51  
52 difficult cases and make use of each other's expertise. If necessary, they consulted other  
53  
54 physicians in the hospital to make their judgments as accurate as possible. The harm caused by  
55  
56 an adverse event was categorised according to the NCC MERP Index as indicated above. They  
57  
58  
59  
60

1  
2  
3 also classified the adverse events into five categories: care, operation, medication, intensive care  
4 (IC), and other.  
5  
6

### 8 9 **A priori record selection with UL-LOS**

10 We selected all records of patients with an admission for colorectal cancer in 2009. Patients with  
11 colorectal cancer are generally considered to be a homogenous population in terms of LOS, and  
12 are relatively vulnerable to adverse events[30]. We excluded duplicated records, records of  
13 palliative patients, and patients who died in the hospital. Then we selected patient records with a  
14 UL-LOS based on the calculations in the LMR discharge data. A nurse screened all these  
15 selected records for the presence of triggers with the trigger tool. Patient records with triggers  
16 were forwarded to the physicians to be investigated for adverse events and the possible harm to  
17 patients. We categorised all records on the basis of the ratio between actual and expected LOS,  
18 into four groups:  
19  
20

- 21 1) actual LOS equal or less than 50% longer than expected;
  - 22 2) actual LOS 50% - 99% longer than expected;
  - 23 3) actual LOS 100% - 199% longer than expected;
  - 24 4) actual LOS 200% or more above the expected LOS.
- 25  
26  
27

28 The last three categories together form the patient group with a UL-LOS. The first category is the  
29 patient group we call non-UL-LOS which is at the same time the reference group. In sum, we  
30 pursued an approach to the record reviewing process by first making the selection on the basis of  
31 discharge abstract data and then working directly with patient medical records. In so doing, we  
32 have developed an effective tool which identifies adverse outcomes directly in hospital medical  
33 records that are being selected with the discharge abstract data.  
34  
35

## 36 37 38 **Results**

### 39 40 41 **UL-LOS-based record selection**

42 In 2009, the hospital in our study admitted, treated, and discharged 191 patients with colorectal  
43 cancer. From this group, we excluded the duplicated patient records and patients who were  
44 admitted for palliative care which resulted in 129 unique patient records. From this group, we  
45  
46  
47  
48  
49  
50  
51  
52  
53  
54  
55  
56  
57  
58  
59  
60

1  
2  
3 selected 85 patients with a UL-LOS (66%). Screening by our nurse with the trigger tool revealed  
4 that 51 of these UL-LOS records contained one or more triggers. Thus, 27% of 191 records  
5 remained to be reviewed by our physicians. Of these records, 43 patient records included one or  
6 more adverse events: 27 records contained one adverse event; 10 records contained two  
7 adverse events; 4 records contained three adverse events; and 2 records contained four adverse  
8 events (see Figure 1).  
9

10  
11  
12  
13  
14  
15  
16 <<Figure 1>>  
17  
18  
19

20 In Table 1, we present the physicians' classification. The adverse events were classified mainly  
21 as operation-related (45%); 60% of the adverse events were considered to have resulted in  
22 temporary harm to the patient, and required initial or prolonged hospitalisation (category F).  
23  
24  
25  
26  
27  
28  
29  
30  
31  
32  
33  
34  
35  
36  
37  
38  
39  
40  
41  
42  
43  
44  
45  
46  
47  
48  
49  
50  
51  
52  
53  
54  
55  
56  
57  
58  
59  
60

Table 1. Number, type, and severity ratings of adverse events found in records of patients admitted with colorectal cancer and a UL-LOS

|                                  |                                                                                    | Type of adverse event |           |            |           |            | Total |             |
|----------------------------------|------------------------------------------------------------------------------------|-----------------------|-----------|------------|-----------|------------|-------|-------------|
|                                  |                                                                                    | Care                  | Medical   | Operation  | IC        | Other      |       |             |
| Severity rating of adverse event | E: temporary harm to the patient and required intervention                         | 7                     | 2         | 3          | 1         | 4          | 17    | <b>25%</b>  |
|                                  | F: temporary harm to the patient and required initial or prolonged hospitalisation | 9                     | 4         | 21         | 2         | 4          | 40    | <b>60%</b>  |
|                                  | G: permanent patient harm                                                          | 0                     | 0         | 4          | 0         | 1          | 5     | <b>7%</b>   |
|                                  | H: intervention required to sustain life                                           | 1                     | 0         | 1          | 0         | 0          | 2     | <b>3%</b>   |
|                                  | I: contributed to patient death                                                    | 1                     | 0         | 1          | 0         | 1          | 3     | <b>4%</b>   |
|                                  | Total                                                                              | 18                    | 6         | 30         | 3         | 10         | 67    |             |
|                                  |                                                                                    | <b>27%</b>            | <b>9%</b> | <b>45%</b> | <b>4%</b> | <b>15%</b> |       | <b>100%</b> |

### The reference group: non-UL-LOS patients

Table 2 shows the number of adverse events compared between UL-LOS and non-UL-LOS patients. In the non-UL-LOS group, in 9% (4 out of 44) of the reviewed records, at least one adverse event was found, compared to 51% (43 out of 85) in the UL-LOS group. We also compared three categories within the UL-LOS (table 2).

Table 2 Number of adverse events compared between UL-LOS and non-UL-LOS patients and within the UL-LOS categories

|                                                                  | N records | N records containing at least 1 trigger | N (and % of) records containing at least 1 adverse event |
|------------------------------------------------------------------|-----------|-----------------------------------------|----------------------------------------------------------|
| Non-UL-LOS patients                                              | 44        | 6                                       | 4 (9%)                                                   |
| All patients with a UL-LOS                                       | 85        | 51                                      | 43 (51%)                                                 |
| - Of which patients with 50%-99% longer-than-expected LOS        | 33        | 14                                      | 9 (27%)                                                  |
| - Of which patients with 100%-199% longer-than-expected LOS      | 32        | 22                                      | 20 (63%)                                                 |
| - Of which patients with 200% and above longer-than-expected LOS | 20        | 15                                      | 14 (70%)                                                 |

## Discussion

The effectiveness of the methodology developed in the current research is impressive, demonstrating that a large majority of the records identified, contained one or more adverse events. With a priori selection using the UL-LOS indicator, we found adverse events in 51% of the records, compared to 9% in the non-UL-LOS group. By reviewing only the UL-LOS group with at least one trigger (66%), we found in 84% (43 out of 51) of all the records with at least one adverse event in the colorectal patient group. Putting it another way, by reviewing only the UL-LOS group with at least one trigger, which is 40% of all patients, we found 91% of all records with at least one adverse event in the colorectal patient group. The fact that almost all records including one or more adverse events can be found by concentrating on records of patients with a UL-LOS and triggers is encouraging for hospitals struggling with a sparse capacity of reviewing physicians.

The percentages of records in which adverse events were identified in the different categories of UL-LOS show that the present formal quality indicator used by the Dutch Health Care

1  
2  
3 Inspectorate identifies most adverse events. Our results show a rise in the percentage in which at  
4  
5 least one adverse event was found from 50% longer LOS onwards. However, it also rises from  
6  
7 100% onwards. A more detailed study is needed to determine the appropriateness of the 50%  
8  
9 threshold. These results apply to colorectal cancer. Future research could also investigate  
10  
11 whether this threshold is appropriate for all diagnostic groups or whether we need varying  
12  
13 percentages.

14  
15  
16 An interesting finding is that only 45% of the adverse events in a group of surgical patients such  
17  
18 as those with colorectal cancer is related to the classification 'operation'. It seems that quality of  
19  
20 care is determined by the whole chain of care, not only by the quality of the organisation in the  
21  
22 operating room or the professionals performing the operation.  
23

#### 24 25 26 Limitations

27  
28 An important limitation of this study is that we identified the number of adverse events in a single  
29  
30 specialty population and in only one hospital. Future research should investigate the validation on  
31  
32 other populations and show whether identifying adverse events in more patient records, in more  
33  
34 hospitals, gives comparable results.  
35

36  
37  
38 Another limitation is the fact that, although we chose to have two physicians analyse the patient  
39  
40 records together, both of them reviewed different records with consulting each other intensively.  
41  
42 Therefore we could not measure the interrater reliability. Our main concern was to organise the  
43  
44 review process as efficiently as possible. Therefore, we chose parallel record reviewing.  
45  
46 However, further research should show whether parallel analysis is reliable enough compared  
47  
48 with consecutive analysis, which still contends with poor reliability[27, 29]. Although current study  
49  
50 shows that the spare time of physicians can be saved by efficient record selection and Global  
51  
52 Trigger Tool, experienced nurses can also review the patient records for the existence of adverse  
53  
54 events. Then the physicians only have to determine the nurse's findings and assess the severity  
55  
56 of harm. Such a strategy can save the time of physicians even more.  
57  
58  
59  
60

1  
2  
3 The results of this study are encouraging in showing that hospitals can and will use quality  
4 indicators based on administrative data for patient safety policy. This type of hospital data is  
5 usually easily available without an extra administrative burden for hospitals. Earlier research has  
6 shown the reliability of using administrative data in relation to clinical data[31]. However, the  
7 reliability of indicators such as UL-LOS depends on the quality of coding in hospitals[32]. Also in  
8 the Netherlands, the quality of administrative hospital data is subject to debate. If the quality of  
9 data coding in hospitals were to improve, the selection efficiency of quality indicators such as UL-  
10 LOS would probably be more accurate. The use of such quality indicators in combination with  
11 effective methods as Global Trigger Tool be identify even more easily adverse events from the  
12 patient records[17, 33].  
13  
14  
15  
16  
17  
18  
19  
20  
21  
22  
23

## 24 **Conclusion**

25 Easily available selection methods such as UL-LOS and the Global Trigger Tool may be a  
26 powerful way of finding a majority of adverse events while limiting the number of patient records  
27 to be reviewed and thereby saving the reviewing physicians' valuable time. This could help  
28 hospitals to organise their patient safety policy as efficiently as possible.  
29  
30  
31  
32  
33  
34  
35

36 **Acknowledgment** We would like to thank A Jonkheim, who screened all of the patient files, and  
37 the physicians FC Henny and JW Juttman of Tergooiziekenhuizen, who went through all of the  
38 selected patient files.  
39  
40  
41  
42  
43  
44  
45  
46  
47  
48  
49  
50  
51  
52  
53  
54  
55  
56  
57  
58  
59  
60

## References

1 Lagoe RJ, Westert GP, Czyz AM, et al. Reducing potentially preventable complications at the multi hospital level. *BMC Res Notes* 2011;**4**:271.

2 Baker GR, Norton PG, Flintoft V, et al. The Canadian Adverse Events Study: the incidence of adverse events among hospital patients in Canada. *CMAJ* 2004;**170**:1678-86.

3 Davis P, Lay-Yee R, Briant R, et al. Adverse events in New Zealand public hospitals I: occurrence and impact. *N Z Med J* 2002;**115**:U271.

4 Michel P, Quenon JL, de Sarasqueta AM, et al. Comparison of three methods for estimating rates of adverse events and rates of preventable adverse events in acute care hospitals. *BMJ* 2004;**328**:199.

5 Wilson RM, Runciman WB, Gibberd RW, et al. The Quality in Australian Health Care Study. *Med J Aust* 1995;**163**:458-71.

6 Zegers M, de Bruijne MC, Wagner C, et al. Adverse events and potentially preventable deaths in Dutch hospitals: results of a retrospective patient record review study. *Qual Saf Health Care* 2009;**18**:297-302.

7 Thomas EJ, Studdert DM, Runciman WB, et al. A comparison of iatrogenic injury studies in Australia and the USA. I: Context, methods, casemix, population, patient and hospital characteristics. *Int J Qual Health Care* 2000;**12**:371-8.

8 Runciman WB, Webb RK, Helps SC, et al. A comparison of iatrogenic injury studies in Australia and the USA. II: Reviewer behaviour and quality of care. *Int J Qual Health Care* 2000;**12**:379-88.

9 de Vries EN, Ramrattan MA, Smorenburg SM, et al. The incidence and nature of in-hospital adverse events: a systematic review. *Qual Saf Health Care* 2008;**17**:216-23.



1  
2  
3 10 Zhan C, Kelley E, Yang HP, et al. Assessing patient safety in the United States: challenges  
4 and opportunities. *Med Care* 2005;**43**:142-7.

5  
6  
7  
8 11 Zhan C, Miller MR. Administrative data based patient safety research: a critical review. *Qual*  
9 *Saf Health Care* 2003;**12 Suppl 2**:ii58-63.

10  
11  
12  
13 12 Iezzoni LI, Daley J, Heeren T, et al. Identifying complications of care using administrative data.  
14 *Med Care* 1994;**32**:700-15.

15  
16  
17  
18 13 Iezzoni LI. *Risk adjustment for measuring health care outcomes*. 3rd ed. Chicago: Health  
19 Administration Press; 2003.

20  
21  
22  
23 14 Rivard PE, Luther SL, Christiansen CL, et al. Using patient safety indicators to estimate the  
24 impact of potential adverse events on outcomes. *Med Care Res Rev* 2008;**65**:67-87.

25  
26  
27  
28 15 Hoonhout LH, de Bruijne MC, Wagner C, et al. Nature, occurrence and consequences of  
29 medication-related adverse events during hospitalization: a retrospective chart review in the  
30 Netherlands. *Drug Saf* 2010;**33**:853-64.

31  
32  
33  
34 16 Hoonhout LH, de Bruijne MC, Wagner C, et al. Direct medical costs of adverse events in  
35 Dutch hospitals. *BMC Health Serv Res* 2009;**9**:27.

36  
37  
38  
39 17 Sari AB, Sheldon TA, Cracknell A, et al. Extent, nature and consequences of adverse events:  
40 results of a retrospective casenote review in a large NHS hospital. *Qual Saf Health Care*  
41 2007;**16**:434-9.

42  
43  
44  
45 18 Ehsani JP, Jackson T, Duckett SJ. The incidence and cost of adverse events in Victorian  
46 hospitals 2003-04. *Med J Aust* 2006;**184**:551-5.

47  
48  
49  
50 19 Cho SH, Ketefian S, Barkauskas VH, et al. The effects of nurse staffing on adverse events,  
51 morbidity, mortality, and medical costs. *Nurs Res* 2003;**52**:71-9.

1  
2  
3 20 Camp M, Chang DC, Zhang Y, et al. Risk factors and outcomes for foreign body left during a  
4 procedure: analysis of 413 incidents after 1 946 831 operations in children. *Arch Surg*  
5 2010;**145**:1085-90.  
6  
7

8  
9  
10 21 Lotfipour S, Kaku SK, Vaca FE, et al. Factors associated with complications in older adults  
11 with isolated blunt chest trauma. *West J Emerg Med* 2009;**10**:79-84.  
12

13  
14 22 Williams DJ, Olsen S, Crichton W, et al. Detection of adverse events in a Scottish hospital  
15 using a consensus-based methodology. *Scott Med J* 2008;**53**:26-30.  
16  
17

18  
19 23 Kaushal R, Bates DW, Franz C, et al. Costs of adverse events in intensive care units. *Crit*  
20 *Care Med* 2007;**35**:2479-83.  
21  
22

23  
24 24 Rice-Townsend S, Hall M, Jenkins KJ, et al. Analysis of adverse events in pediatric surgery  
25 using criteria validated from the adult population: justifying the need for pediatric-focused  
26 outcome measures. *J Pediatr Surg* 2010;**45**:1126-36.  
27  
28

29  
30 25 Silber JH, Rosenbaum PR, Koziol LF, et al. Conditional Length of Stay. *Health Serv Res*  
31 1999;**34**:349-63.  
32  
33

34  
35 26 Landelijke Medische Registratie (LMR). Available at:  
36 <http://www.dutchhospitaldata.nl/registraties/lmrlazr/Paginas/default.aspx>. Accessed 06/10, 2013.  
37  
38

39  
40 27 Griffin F, Resar R. *IHI Global Trigger Tool for Measuring Adverse Events*. 2nd ed.  
41 Massachusetts: Institute for Healthcare Improvement; 2009.  
42  
43

44  
45 28 Index for Categorizing Errors. Available at: <http://www.nccmerp.org/medErrorCatIndex.html>.  
46 Accessed 06/12, 2013.  
47  
48

49  
50 29 Langelaan M, Baines RJ, Broekens MA, et al. Monitor Zorggerelateerde Schade 2008,  
51 dossieronderzoek in Nederlandse ziekenhuizen. NIVEL; 2010.  
52  
53  
54  
55  
56  
57  
58  
59  
60

1  
2  
3 30 Sjo OH, Larsen S, Lunde OC, et al. Short term outcome after emergency and elective surgery  
4 for colon cancer. *Colorectal Dis* 2009;**11**:733-9.  
5  
6

7  
8 31 Aylin P, Bottle A, Majeed A. Use of administrative data or clinical databases as predictors of  
9 risk of death in hospital: comparison of models. *BMJ* 2007;**334**:1044.  
10  
11

12  
13 32 van den Bosch WF, Kelder JC, Wagner C. Predicting hospital mortality among frequently  
14 readmitted patients: HSMR biased by readmission. *BMC Health Serv Res* 2011;**11**:57.  
15  
16

17  
18 33 Classen DC, Resar R, Griffin F, et al. 'Global trigger tool' shows that adverse events in  
19 hospitals may be ten times greater than previously measured. *Health Aff (Millwood)* 2011;**30**:581-  
20  
21  
22 9.  
23  
24  
25  
26  
27  
28  
29  
30  
31  
32  
33  
34  
35  
36  
37  
38  
39  
40  
41  
42  
43  
44  
45  
46  
47  
48  
49  
50  
51  
52  
53  
54  
55  
56  
57  
58  
59  
60

1  
2  
3  
4  
5  
6  
7  
8  
9  
10  
11  
12  
13  
14  
15  
16  
17  
18  
19  
20  
21  
22  
23  
24  
25  
26  
27  
28  
29  
30  
31  
32  
33  
34  
35  
36  
37  
38  
39  
40  
41  
42  
43



\*Only trigger: increased length of stay

n = number of patient records For peer review only - <http://bmjopen.bmj.com/site/about/guidelines.xhtml>

% is of total selection of patient records

## Article Summary

### Article focus

- Record reviewing in order to identify adverse events is time-consuming.
- A priori selection of patient records on the basis of Unexpectedly Long Length of Stay (UL-LOS) can be an efficient way to increase the chance of finding adverse events.

### Key message

- Selection of patient records with the UL-LOS and use of the Global Trigger Tool appear to be a powerful way of finding a majority of adverse events while limiting the number of patient records to be reviewed and thereby saving the reviewing physicians' valuable time.

### Strengths and limitations

- This is the first study to look at the effectiveness of UL-LOS.
- A limitation of the study is that it was investigated in only one group of patients. Future research should investigate the effectiveness of UL-LOS in other diagnostic groups.

**Author's statement:** The authors declare that there are no competing interests, the research did not receive any funding and there are no additional unpublished data from the study. The study did not involve human subjects and the design of the study does not require ethical approval.

**Objectives:** To investigate whether a priori selection of patient records using Unexpectedly Long Length of Stay (UL-LOS) leads to detection of more records with adverse events (AEs) compared to non-UL-LOS.

**Design:** To investigate the opportunities of the UL-LOS, we looked for AEs in all records of patients with colorectal cancer. Within this group, we compared the number of AEs found in records of patients with a UL-LOS with the number found in records of patients who did not have a UL-LOS.

**Setting:** Our study was done at a general hospital in the Netherlands. The hospital is medium sized with approximately 30,000 admissions on an annual basis. The hospital has two major locations in different cities where both primary and secondary care is provided.

**Participants:** The patient records of 191 patients with colorectal cancer were reviewed.

**Primary and secondary outcome measures:** Number of triggers and adverse events were the primary outcome measures.

**Results:** In the records of patients with colorectal cancer who had a UL-LOS, 51% of the records contained one or more AEs compared to 9% in the reference group of non-UL-LOS patients. By reviewing only the UL-LOS group with at least one trigger, we found in 84% (43 out of 51) of these records at least one adverse event.

**Conclusions:** A priori selection of patient records using the UL-LOS indicator appears to be a powerful selection method which could be an effective way for healthcare professionals to identify opportunities to improve patient safety in their day-to-day work.

**Word count abstract:** 248

## Introduction

Within health services research, increased attention is focusing on patient outcomes. This results from the need to improve care and the need to reduce costs. As studies increasingly evaluate patient care, the need exists to identify adverse outcomes within patient medical records. This is a major challenge because medical records are usually extensive and sometimes difficult to evaluate. In the United States, this subject is being addressed by computer algorithms such as the Potentially Preventable Complications and the Potentially Preventable Readmissions software. These algorithms use hospital discharge abstract data to identify adverse outcomes in large populations. The development of these algorithms has been a long and resource intensive process<sup>[1]</sup>. The current research addresses this important subject by developing a tool for identifying adverse outcomes in the Netherlands. The research involved patients at a medium sized hospital where the volume of inpatients makes the identification of specific patients with adverse outcomes a challenging undertaking.

Furthermore, ~~Diminishing~~ the number of patient-related adverse events ~~is became~~ one of the top priorities for Dutch hospitals. A common way to achieve this is to learn from incidents and take action to prevent recurrence. To identify the adverse events, retrospective patient record review has become the 'gold standard' (inter)nationally<sup>[2-6]</sup>. By retrospectively reviewing patient records, healthcare professionals are able to identify adverse events that occurred during the care process. Several studies on retrospective patient record review in different countries have shown a wide range of incidences of adverse events, varying from 2.9% to 16.6% with a median overall incidence of adverse events of 9.2%<sup>[7-9]</sup>. This implies that, with random selection from all hospital records, a healthcare professional has to review 6 to 34 records to find one adverse event. These results show that although record reviewing has been proved very advantageous in finding adverse events, there is an important disadvantage: record reviewing is very time-consuming. Although most Dutch hospitals want to analyse their patient records for adverse events in order to identify patient safety opportunities, many hospitals are not able to mobilise enough physicians who can spend many hours reviewing patient records.

Looking for more efficient ways to organise patient record reviewing, we investigated how to increase the chance of finding adverse events. Previous research has shown strong relationships between adverse events and outcomes of quality indicators at patient and hospital level[10-12]. For instance, one study identified a relationship between complications and increased mortality and length of stay (LOS)[13]. A more recent study on the United States Veterans Health Administration data replicated these relationships between adverse events and patient safety indicators of the Agency for Healthcare Research and Quality[14]. Several other studies have indicated that adverse events often lead to prolonged LOS, and prolonged LOS could signal safety issues[15-24]. Silber et al for instance showed that LOS can be used to reflect how well hospitals and providers deal with complications and adverse events[25].

The above mentioned studies suggest that negative results on quality indicators could be attributed to adverse events. In the current study, we hypothesize that records of patients with an Unexpectedly Long Length of Stay (UL-LOS) will show more adverse events. This patient safety indicator is already three years in use by Dutch hospitals and derived from administrative medical data. If so, the indicator could be used for selecting patient records in order to find more adverse events and save the valuable time of those reviewing patient records.

To test the hypothesis that looking for adverse events can be done efficiently by selecting patient records using UL-LOS, we conducted a pilot study with a retrospective review of patient records in Tergooiziekenhuizen, a general hospital in the Netherlands. This article describes the pilot study. The results of this study might help hospitals organise their record-reviewing process in the most efficient way possible by using the quality indicator that already is available to them through existing registries.

## Methods

### The quality indicator UL-LOS

In our study, we used the quality indicator UL-LOS 2009 to make the a priori selection. The UL-LOS is based on the data from the National Medical Registration (LMR). The LMR contains



demographical patient information, admission related hospital data such as diagnosis, and surgical procedures[26]. UL-LOS is generated by indirect standardisation on three patient characteristics: age, primary diagnosis, and the main procedure that the patient underwent. Age of the patient is divided into 5 classes of 0, 1-14, 15-44, 45-64, and 65 and older. For the primary diagnoses we used the diagnosis that led to the admission which includes approximately 1,000 diagnoses classified by the ICD9 in three digits. Finally, the main procedure is determined by the Dutch Classification System of Procedures and is considered to depend on the diagnosis of the patient. On average it includes five main procedural groups. Together, these three parameters resulted in  $5 \times 5 \times 1,000 = 25,000$  cells. For each cell the mean length of stay has been taken as the expected length of stay. Then the ratio between the actual length of stay and the expected length of stay is taken to calculate the UL-LOS. We define the UL-LOS as a LOS that is more than 50% longer than expected. Patients who died in the hospital are excluded. In addition, UL-LOS is a quality indicator Dutch hospitals use for their quality-improvement programmes and the Dutch Health Care Inspectorate uses UL-LOS in its supervision of hospital care.

### Setting

The study was done in 2010 and 2011 at Tergooiziekenhuizen, a general hospital with nearly 30,000 clinical admissions a year. We used data and patient records from 2009. The hospital board gave us permission to use the data.

### Reference groups

To assess the impact of the indicator UL-LOS, we selected [from 191 colorectal admissions](#), records with the UL-LOS and compared these records with the reference group consisting of comparable patients [from the same speciality population](#), -who were treated at Tergooiziekenhuizen without a UL-LOS.

### Analysis with the IHI Global Trigger Tool

A nurse used the IHI (Institute for Healthcare Improvement) Global Trigger Tool to search all selected patient records for triggers[27]. [The nurse that did the screening of triggers for this study](#)

1  
2  
3  
4  
5  
6  
7 was experienced with the use of the Global Trigger Tool. Triggers may contain clues for  
8 identifying possible adverse events. This instrument adapts the classification from the National  
9 Coordinating Council for Medication Error Reporting and Prevention (NCC MERP[28]) Index for  
10 Categorizing Errors. Although originally developed for categorising medication errors, these  
11 definitions can be easily applied to any type of adverse event. The IHI Global Trigger Tool was  
12 developed to count adverse events, determine the harm to the patient, and whether the adverse  
13 event was the result of a commission. According to the IHI, only cases of commission should be  
14 counted. However we also counted cases of omission, as these are also a valuable source of  
15 possible quality improvement[6, 29].  
16  
17  
18  
19  
20  
21  
22

23 Accordingly, the tool excludes the categories A to D from the NCC MERP Index, because these  
24 categories describe incidents that do not cause harm. We used the categories E to I, which do  
25 describe harm that may have contributed to or resulted in:  
26  
27

- 28 • temporary harm to the patient and required intervention (Category E);
- 29 • temporary harm to the patient and required initial or prolonged hospitalisation (Category  
30 F);
- 31 • permanent patient harm (Category G);
- 32 • intervention required to sustain life (Category H); and
- 33 • contributed to or resulted in the patient's death (Category I).  
34  
35  
36  
37  
38  
39

40 A surgeon and an internist-nephrologist investigated and looked for adverse events in the patient  
41 records in which the nurse had found triggers. The physicians and the nurses were trained  
42 extensively according to the IHI Trigger Tool implementation programme to make sure that they  
43 all worked according to the same IHI methodology. The patient records were randomly divided  
44 between the physicians. They analysed these records in the same room in order to discuss  
45 difficult cases and make use of each other's expertise. If necessary, they consulted other  
46 physicians in the hospital to make their judgments as accurate as possible. The harm caused by  
47 an adverse event was categorised according to the NCC MERP Index as indicated above. They  
48  
49  
50  
51  
52  
53  
54  
55  
56  
57  
58  
59  
60

1  
2  
3  
4  
5  
6  
7 also classified the adverse events into five categories: care, operation, medication, intensive care  
8 (IC), and other.  
9

### 10 11 **A priori record selection with UL-LOS**

12  
13 We selected all records of patients with an admission for colorectal cancer in 2009. Patients with  
14 colorectal cancer are generally considered to be a homogenous population in terms of LOS, and  
15 are relatively vulnerable to adverse events[30]. We excluded duplicated records, records of  
16 palliative patients, and patients who died in the hospital. Then we selected patient records with a  
17 UL-LOS [based on the calculations in the LMR discharge data](#). A nurse screened all these  
18 selected records for the presence of triggers with the  $\mathcal{T}$ trigger tool. Patient records with triggers  
19 were forwarded to the physicians to be investigated for adverse events and the possible harm to  
20 patients. We categorised all records on the basis of the ratio between actual and expected LOS,  
21 into four groups:  
22  
23  
24  
25  
26  
27

- 28 1) actual LOS equal or less than 50% longer than expected;
- 29 2) actual LOS 50% - 99% longer than expected;
- 30 3) actual LOS 100% - 199% longer than expected;
- 31 4) actual LOS 200% or more above the expected LOS.

32  
33  
34  
35 The last three categories together form the patient group with a UL-LOS. The first category is the  
36 patient group we call non-UL-LOS which is at the same time the reference group. [In sum, we  
37 pursued an approach to the record reviewing process by first making the selection on the basis of  
38 discharge abstract data and then working directly with patient medical records. In so doing, we  
39 have developed an effective tool which identifies adverse outcomes directly in hospital medical  
40 records that are being selected with the discharge abstract data.](#)  
41  
42  
43  
44  
45

## 46 **Results**

### 47 **UL-LOS-based record selection**

48  
49 In 2009, the hospital in our study admitted, treated, and discharged 191 patients with colorectal  
50 cancer. From this group, we excluded the duplicated patient records and patients who were  
51 admitted for palliative care which resulted in 129 unique patient records. From this group, we  
52  
53  
54  
55  
56  
57  
58  
59  
60

1  
2  
3  
4  
5  
6  
7 selected 85 patients with a UL-LOS (66%). Screening by our nurse with the trigger tool revealed  
8 that 51 of these UL-LOS records contained one or more triggers. Thus, 27% of 191 records  
9 remained to be reviewed by our physicians. Of these records, 43 patient records included one or  
10 more adverse events: 27 records contained one adverse event; 10 records contained two  
11 adverse events; 4 records contained three adverse events; and 2 records contained four adverse  
12 events (see Figure 1).  
13  
14  
15  
16

17  
18 <<Figure 1>>  
19

20  
21 In Table 1, we present the physicians' classification. The adverse events were classified mainly  
22 as operation-related (45%); 60% of the adverse events were considered to have resulted in  
23 temporary harm to the patient, and required initial or prolonged hospitalisation (category F).  
24  
25  
26  
27  
28  
29  
30  
31  
32  
33  
34  
35  
36  
37  
38  
39  
40  
41  
42  
43  
44  
45  
46  
47  
48  
49  
50  
51  
52  
53  
54  
55  
56  
57  
58  
59  
60

9

Table 1. Number, type, and severity ratings of adverse events found in records of patients admitted with colorectal cancer and a UL-LOS

|                                  |                                                                                    | Type of adverse event |           |            |           |            | Total |             |
|----------------------------------|------------------------------------------------------------------------------------|-----------------------|-----------|------------|-----------|------------|-------|-------------|
|                                  |                                                                                    | Care                  | Medical   | Operation  | IC        | Other      |       |             |
| Severity rating of adverse event | E: temporary harm to the patient and required intervention                         | 7                     | 2         | 3          | 1         | 4          | 17    | <b>25%</b>  |
|                                  | F: temporary harm to the patient and required initial or prolonged hospitalisation | 9                     | 4         | 21         | 2         | 4          | 40    | <b>60%</b>  |
|                                  | G: permanent patient harm                                                          | 0                     | 0         | 4          | 0         | 1          | 5     | <b>7%</b>   |
|                                  | H: intervention required to sustain life                                           | 1                     | 0         | 1          | 0         | 0          | 2     | <b>3%</b>   |
|                                  | I: contributed to patient death                                                    | 1                     | 0         | 1          | 0         | 1          | 3     | <b>4%</b>   |
| Total                            |                                                                                    | 18                    | 6         | 30         | 3         | 10         | 67    |             |
|                                  |                                                                                    | <b>27%</b>            | <b>9%</b> | <b>45%</b> | <b>4%</b> | <b>15%</b> |       | <b>100%</b> |

#### The reference group: non-UL-LOS patients

Table 2 shows the number of adverse events compared between UL-LOS and non-UL-LOS patients. In the non-UL-LOS group, in 9% (4 out of 44) of the reviewed records, at least one adverse event was found, compared to 51% (43 out of 85) in the UL-LOS group. We also compared three categories within the UL-LOS (table 2).

Table 2 Number of adverse events compared between UL-LOS and non-UL-LOS patients and within the UL-LOS categories

|                                                                  | N records | N records containing at least 1 trigger | N (and % of) records containing at least 1 adverse event |
|------------------------------------------------------------------|-----------|-----------------------------------------|----------------------------------------------------------|
| Non-UL-LOS patients                                              | 44        | 6                                       | 4 (9%)                                                   |
| All patients with a UL-LOS                                       | 85        | 51                                      | 43 (51%)                                                 |
| - Of which patients with 50%-99% longer-than-expected LOS        | 33        | 14                                      | 9 (27%)                                                  |
| - Of which patients with 100%-199% longer-than-expected LOS      | 32        | 22                                      | 20 (63%)                                                 |
| - Of which patients with 200% and above longer-than-expected LOS | 20        | 15                                      | 14 (70%)                                                 |

### Discussion

The effectiveness of the methodology developed in the current research is impressive, demonstrating that a large majority of the records identified, contained one or more adverse events. With a priori selection using the UL-LOS indicator, we found adverse events in 51% of the records, compared to 9% in the non-UL-LOS group. By reviewing only the UL-LOS group with at least one trigger (66%), we found in 84% (43 out of 51) of all the records with at least one adverse event in the colorectal patient group. Putting it another way, by reviewing only the UL-LOS group with at least one trigger, which is 40% of all patients, we found 91% of all records with at least one adverse event in the colorectal patient group. The fact that almost all records including one or more adverse events can be found by concentrating on records of patients with a UL-LOS and triggers is encouraging for hospitals struggling with a sparse capacity of reviewing physicians.

The percentages of records in which adverse events were identified in the different categories of UL-LOS show that the present formal quality indicator used by the Dutch Health Care

Inspectorate identifies most adverse events. Our results show a rise in the percentage in which at least one adverse event was found from 50% longer LOS onwards. However, it also rises from 100% onwards. A more detailed study is needed to determine the appropriateness of the 50% threshold. These results apply to colorectal cancer. Future research could also investigate whether this threshold is appropriate for all diagnostic groups or whether we need varying percentages.

An interesting finding is that only 45% of the adverse events in a group of surgical patients such as those with colorectal cancer is related to the classification 'operation'. It seems that quality of care is determined by the whole chain of care, not only by the quality of the organisation in the operating room or the professionals performing the operation.

#### Limitations

An important limitation of this study is that we identified the number of adverse events in only one group of patients a single speciality population and in only one hospital. Future research should investigate the validation on other populations and show whether identifying adverse events in more patient records, also from other patient groups in more hospitals, gives comparable results.

Another limitation is the fact that, although we chose to have two physicians analyse the patient records together, both of them reviewed different records with consulting each other intensively. Therefore we could not measure the interrater reliability. Our main concern was to organise the review process as efficiently as possible. Therefore, we chose parallel record reviewing.

However, further research should show whether parallel analysis is reliable enough compared with consecutive analysis, which still contends with poor reliability[27, 29]. Although current study shows that the spare time of physicians can be saved by efficient record selection and Global Trigger Tool, experienced nurses can also review the patient records for the existence of adverse events. Then the physicians only have to determine the nurse's findings and assess the severity of harm. Such a strategy can save the time of physicians even more.

1  
2  
3  
4  
5  
6  
7 The results of this study are encouraging in showing that hospitals can and will use quality  
8 indicators based on administrative data for patient safety policy. This type of hospital data is  
9 usually easily available without an extra administrative burden for hospitals. Earlier research has  
10 shown the reliability of using administrative data in relation to clinical data[31]. However, the  
11 reliability of indicators such as UL-LOS depends on the quality of coding in hospitals[32]. Also in  
12 the Netherlands, the quality of administrative hospital data is subject to debate. If the quality of  
13 data coding in hospitals were to improve, the selection efficiency of quality indicators such as UL-  
14 LOS would probably be more accurate. The use of such quality indicators in combination with  
15 effective methods as Global Trigger Tool be identify even more easily adverse events from the  
16 patient records[17, 33].  
17  
18  
19  
20  
21  
22  
23  
24

#### 25 **Conclusion**

26 Easily available selection methods such as UL-LOS and the Global Trigger Tool may be a  
27 powerful way of finding a majority of adverse events while limiting the number of patient records  
28 to be reviewed and thereby saving the reviewing physicians' valuable time. This could help  
29 hospitals to organise their patient safety policy as efficiently as possible.  
30  
31  
32  
33  
34

35 **Acknowledgment** We would like to thank A Jonkheim, who screened all of the patient files, and  
36 the physicians FC Henny and JW Juttman of Tergooziekenhuizen, who went through all of the  
37 selected patient files.  
38  
39  
40  
41  
42  
43  
44  
45  
46  
47  
48  
49  
50  
51  
52  
53  
54  
55  
56  
57  
58  
59  
60



## References

1 Lagoe RJ, Westert GP, Czyz AM, et al. Reducing potentially preventable complications at the multi hospital level. *BMC Res Notes* 2011;**4**:271.

2 Baker GR, Norton PG, Flintoft V, et al. The Canadian Adverse Events Study: the incidence of adverse events among hospital patients in Canada. *CMAJ* 2004;**170**:1678-86.

3 Davis P, Lay-Yee R, Briant R, et al. Adverse events in New Zealand public hospitals I: occurrence and impact. *N Z Med J* 2002;**115**:U271.

4 Michel P, Quenon JL, de Sarasqueta AM, et al. Comparison of three methods for estimating rates of adverse events and rates of preventable adverse events in acute care hospitals. *BMJ* 2004;**328**:199.

5 Wilson RM, Runciman WB, Gibberd RW, et al. The Quality in Australian Health Care Study. *Med J Aust* 1995;**163**:458-71.

6 Zegers M, de Bruijne MC, Wagner C, et al. Adverse events and potentially preventable deaths in Dutch hospitals: results of a retrospective patient record review study. *Qual Saf Health Care* 2009;**18**:297-302.

7 Thomas EJ, Studdert DM, Runciman WB, et al. A comparison of iatrogenic injury studies in Australia and the USA. I: Context, methods, casemix, population, patient and hospital characteristics. *Int J Qual Health Care* 2000;**12**:371-8.

8 Runciman WB, Webb RK, Helps SC, et al. A comparison of iatrogenic injury studies in Australia and the USA. II: Reviewer behaviour and quality of care. *Int J Qual Health Care* 2000;**12**:379-88.

9 de Vries EN, Ramrattan MA, Smorenburg SM, et al. The incidence and nature of in-hospital adverse events: a systematic review. *Qual Saf Health Care* 2008;**17**:216-23.

10 Zhan C, Kelley E, Yang HP, et al. Assessing patient safety in the United States: challenges and opportunities. *Med Care* 2005;**43**:142-7.

11 Zhan C, Miller MR. Administrative data based patient safety research: a critical review. *Qual Saf Health Care* 2003;**12 Suppl 2**:ii58-63.

12 Iezzoni LI, Daley J, Heeren T, et al. Identifying complications of care using administrative data. *Med Care* 1994;**32**:700-15.

13 Iezzoni LI. *Risk adjustment for measuring health care outcomes*. 3rd ed. Chicago: Health Administration Press; 2003.

14 Rivard PE, Luther SL, Christiansen CL, et al. Using patient safety indicators to estimate the impact of potential adverse events on outcomes. *Med Care Res Rev* 2008;**65**:67-87.

15 Hoonhout LH, de Bruijne MC, Wagner C, et al. Nature, occurrence and consequences of medication-related adverse events during hospitalization: a retrospective chart review in the Netherlands. *Drug Saf* 2010;**33**:853-64.

16 Hoonhout LH, de Bruijne MC, Wagner C, et al. Direct medical costs of adverse events in Dutch hospitals. *BMC Health Serv Res* 2009;**9**:27.

17 Sari AB, Sheldon TA, Cracknell A, et al. Extent, nature and consequences of adverse events: results of a retrospective casenote review in a large NHS hospital. *Qual Saf Health Care* 2007;**16**:434-9.

18 Ehsani JP, Jackson T, Duckett SJ. The incidence and cost of adverse events in Victorian hospitals 2003-04. *Med J Aust* 2006;**184**:551-5.

19 Cho SH, Ketefian S, Barkauskas VH, et al. The effects of nurse staffing on adverse events, morbidity, mortality, and medical costs. *Nurs Res* 2003;**52**:71-9.

20 Camp M, Chang DC, Zhang Y, et al. Risk factors and outcomes for foreign body left during a procedure: analysis of 413 incidents after 1 946 831 operations in children. *Arch Surg* 2010;**145**:1085-90.

21 Lotfipour S, Kaku SK, Vaca FE, et al. Factors associated with complications in older adults with isolated blunt chest trauma. *West J Emerg Med* 2009;**10**:79-84.

22 Williams DJ, Olsen S, Crichton W, et al. Detection of adverse events in a Scottish hospital using a consensus-based methodology. *Scott Med J* 2008;**53**:26-30.

23 Kaushal R, Bates DW, Franz C, et al. Costs of adverse events in intensive care units. *Crit Care Med* 2007;**35**:2479-83.

24 Rice-Townsend S, Hall M, Jenkins KJ, et al. Analysis of adverse events in pediatric surgery using criteria validated from the adult population: justifying the need for pediatric-focused outcome measures. *J Pediatr Surg* 2010;**45**:1126-36.

25 Silber JH, Rosenbaum PR, Koziol LF, et al. Conditional Length of Stay. *Health Serv Res* 1999;**34**:349-63.

26 Landelijke Medische Registratie (LMR). Available at:

<http://www.dutchhospitaldata.nl/registraties/lmrlazr/Paginas/default.aspx>. Accessed 06/10, 2013.

Field Code Changed

27 Griffin F, Resar R. *IHI Global Trigger Tool for Measuring Adverse Events*. 2nd ed. Massachusetts: Institute for Healthcare Improvement; 2009.

28 Index for Categorizing Errors. Available at: <http://www.nccmerp.org/medErrorCatIndex.html>. Accessed 06/12, 2013.

29 Langelaan M, Baines RJ, Broekens MA, et al. Monitor Zorggerelateerde Schade 2008, dossieronderzoek in Nederlandse ziekenhuizen. NIVEL; 2010.

30 Sjo OH, Larsen S, Lunde OC, et al. Short term outcome after emergency and elective surgery for colon cancer. *Colorectal Dis* 2009;**11**:733-9.

31 Aylin P, Bottle A, Majeed A. Use of administrative data or clinical databases as predictors of risk of death in hospital: comparison of models. *BMJ* 2007;**334**:1044.

32 van den Bosch WF, Kelder JC, Wagner C. Predicting hospital mortality among frequently readmitted patients: HSMR biased by readmission. *BMC Health Serv Res* 2011;**11**:57.

33 Classen DC, Resar R, Griffin F, et al. 'Global trigger tool' shows that adverse events in hospitals may be ten times greater than previously measured. *Health Aff (Millwood)* 2011;**30**:581-9.
